# Supplementary material for: The prognostic value of YAP1 on clinical outcomes in human cancers
Source: PubMed Central journal article supplement (PMC6814621; doi:10.18632/aging.102358), 2019-10-15
Supplement: aging-11-102358-s004.pdf [file aging-11-102358-s004.pdf]

**SUPPLEMENTARY FIGURES**

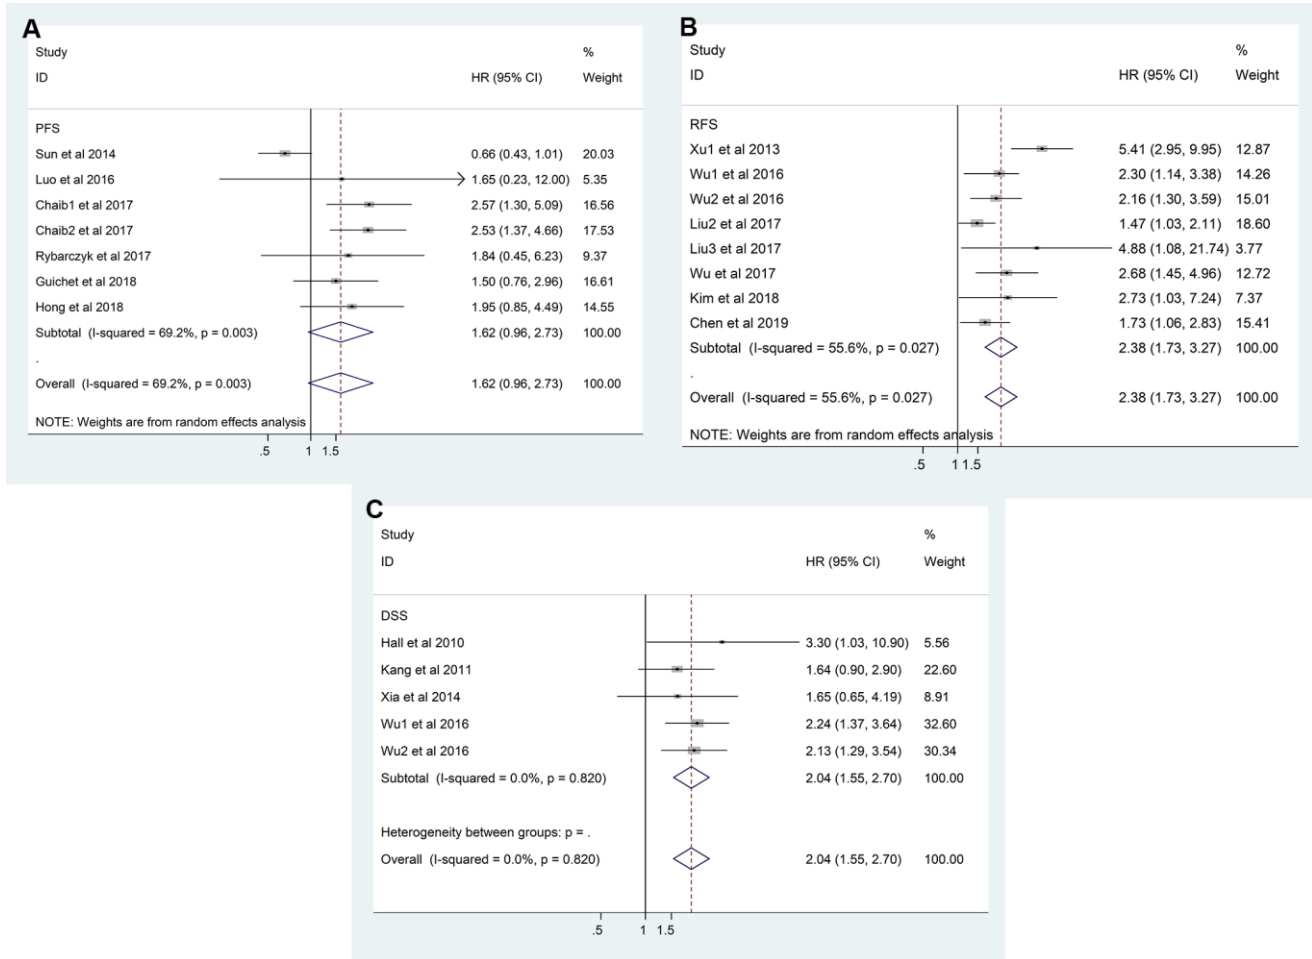

**Supplementary Figure 1. Forest plot of HR for association between YAP1 overexpression and PFS, RFS and DSS.** Note: Weights are all from random-effects analysis. Abbreviations: CI confidence interval; DSS disease-specific survival; HR hazard ratio; PFS progression-free survival; RFS recurrence-free survival.

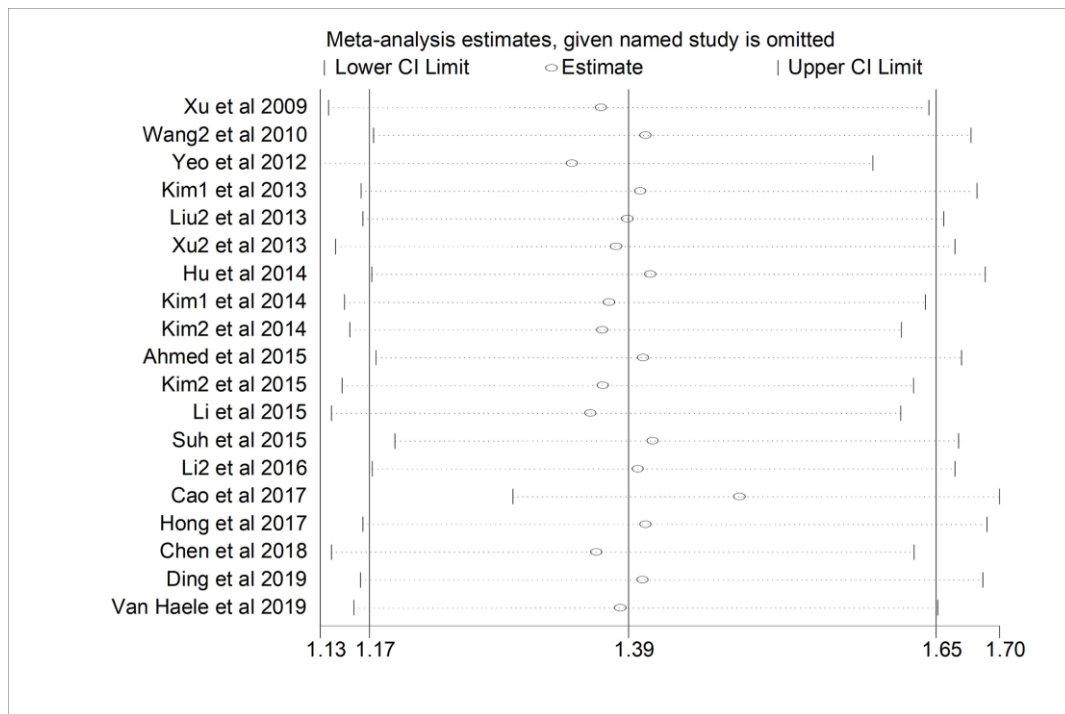

**Supplementary Figure 2. Sensitivity analysis to evaluate the influence of every study reporting DFS in our meta-analysis.** Abbreviation: DFS disease-free survival; CI confidence interval.

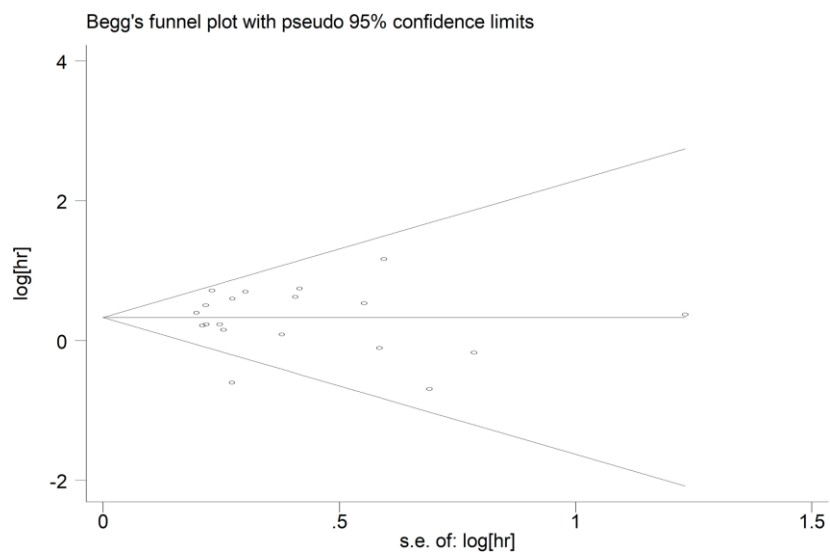

**Supplementary Figure 3. Begg's funnel plot of publication bias for included studies reporting DFS.** Abbreviation: DFS disease-free survival; CI confidence interval.
